# Supplementary material for: Humoral waning kinetics against SARS-CoV-2 is dictated by disease severity and vaccine platform
Source: bioRxiv or medRxiv preprint supplement (doi:10.1101/2024.10.17.24315607), 2024-10-18
Supplement: Supplementary file [file media-1.pdf]

**Title: Humoral waning kinetics against SARS-CoV-2 is dictated by disease severity and vaccine platform**

**Authors:** Xin Tong,<sup>1†</sup> Benjamin Kellman,<sup>1†</sup> Maria-Jose Avendano,<sup>2,†</sup> Maanasa Mendu,<sup>1</sup> Jeff C. Hsiao,<sup>1,8</sup> Eileen Serrano,<sup>2</sup> Tamara Garcia-Salum,<sup>2,3,4</sup> Nicolas Muena,<sup>5</sup> Catalina Pardo-Roa,<sup>2,4,6</sup> Mauricio Morales,<sup>3</sup> Jorge Levican,<sup>2</sup> Erick Salinas,<sup>2</sup> Simone Cardenas-Cáceres,<sup>5</sup> Arnoldo Riquelme,<sup>7</sup> Nicole D. Tischler,<sup>5,8</sup> Douglas A. Lauffenburger,<sup>9</sup> Galit Alter,<sup>1</sup> Ryan P. McNamara,<sup>1</sup> Rafael A. Medina,<sup>2,3,4,10</sup>

**Affiliations:**

<sup>1</sup> Ragon Institute of MGH, MIT, and Harvard, Cambridge, MA, 02139, USA

<sup>2</sup> Department of Pathology and Laboratory Medicine, School of Medicine, Emory University, Atlanta, GA 30322, USA

<sup>3</sup> Department of Pediatric Infectious Diseases and Immunology, School of Medicine, Pontificia Universidad Católica de Chile, Santiago 8331010, Chile

<sup>4</sup> Advanced Interdisciplinary Rehabilitation Register (AIRR) - COVID-19 Working Group, Faculty of Medicine, Pontificia Universidad Católica de Chile, Santiago 8331010, Chile

<sup>5</sup> Laboratorio de Virología Molecular, Fundación Ciencia and Vida, Santiago 8581151, Chile

<sup>6</sup> Department of Child and Adolescent Health, School of Nursing, Pontificia Universidad Católica de Chile, Santiago 8331010, Chile

<sup>7</sup> Department of Gastroenterology, School of Medicine, Pontificia Universidad Católica de Chile, Santiago 8331010, Chile

<sup>8</sup> Escuela de Bioquímica, Facultad de Salud y Ciencia, Universidad San Sebastián, Santiago 7510156, Chile.

<sup>9</sup> Department of Biological Engineering, Massachusetts Institute of Technology, Massachusetts, MA, 02139, USA

<sup>10</sup>Center for Research on Influenza Pathogenesis and Transmission (CRIPT) Center of Excellence of Influenza Research and Response (CEIRR), New York, New York, USA

† These authors contributed equally

\*Corresponding authors: Ryan McNamara (RPMCNAMARA@mgh.harvard.edu), Rafael A. Medina (rafael.medina@emory.edu)

## **Supplementary Material**

Contains Tables S1-S2

Contains Figs S1-S8 and corresponding figure captions

**Supplementary Table S1. Demographic and baseline characteristics of the cohort.**

|                                    | Outpatients<br>(a)<br>(n = 41) | Hospitalized<br>(b)<br>(n = 36) | CoronaVa<br>c (c)<br>(n = 34) | BNT162b2<br>(d)<br>(n = 15) | P value*        | P value#                                                          | Outpatients<br>CoronaVac<br>(n = 26) | Hospitalized<br>CoronaVac<br>(n = 16) | P value^        | Outpatients<br>BNT162b2<br>(n = 3) | Hospitalized<br>BNT162b2<br>(n = 2) | P<br>value^ |
|------------------------------------|--------------------------------|---------------------------------|-------------------------------|-----------------------------|-----------------|-------------------------------------------------------------------|--------------------------------------|---------------------------------------|-----------------|------------------------------------|-------------------------------------|-------------|
| <b>Characteristics</b>             |                                |                                 |                               |                             |                 |                                                                   |                                      |                                       |                 |                                    |                                     |             |
| Male, n (%)                        | 21 (51.2)                      | 25 (69.4)                       | 10 (29.4)                     | 3 (20.0)                    | <b>0.0010</b>   | <b>0.010 (b,c)</b><br><b>0.011 (b,d)</b>                          | 11 (42.3)                            | 10 (62.5)                             | 0.3408          | 1 (33.3)                           | 1 (50)                              | 1           |
| Age, median (IQR)                  | 32<br>(40-26)                  | 53.5<br>(62.5-37.0)             | 33<br>(44-27.25)              | 36<br>(38.5-24.5)           | < <b>0.0001</b> | <b>0.0002 (a,b)</b><br><b>0.0009 (b,c)</b><br><b>0.0040 (b,d)</b> | 33<br>(54.75-27.75)                  | 53.5<br>(62.5-37)                     | <b>0.0295</b>   | 27<br>(28.5-20)                    | 55<br>(58.5-51-5)                   | 0.1489      |
| > 60 years, n (%)                  | 4 (9.8)                        | 12 (33.3)                       | 1 (2.9)                       | 0 (0)                       | <b>0.0007</b>   | <b>0.0083 (b,c)</b>                                               | 3 (11.5)                             | 5 (31.3)                              | 0.2233          | 0 (0)                              | 1 (50)                              | 0.4         |
| <b>Comorbidities or conditions</b> |                                |                                 |                               |                             |                 |                                                                   |                                      |                                       |                 |                                    |                                     |             |
| Obesity (BMI ≥ 30), n (%)          | 5 (12.2)                       | 13 (36.1)                       | 5 (14.7)                      | 3 (20)                      | 0.0613          | NS                                                                | 2 (7.7)                              | 7 (43.8)                              | <b>0.0161</b>   | 1 (33.3)                           | 1 (50)                              | 1           |
| Hypertension, n (%)                | 3 (7.3)                        | 12 (33.3)                       | 3 (8.8)                       | 2 (13.3)                    | <b>0.0119</b>   | <b>0.047 (a,b)</b>                                                | 3 (11.5)                             | 6 (37,5)                              | 0.0628          | 0 (0)                              | 0 (0)                               | NA          |
| Cardiovascular disease, n (%)      | 0 (0)                          | 3 (8.3)                         | 0 (0)                         | 0 (0)                       | 0.0774          | NS                                                                | 0 (0)                                | 1 (6.3)                               | 0.3810          | 0 (0)                              | 0 (0)                               | NA          |
| Chronic pulmonary disease, n (%)   | 6 (14.6)                       | 3 (8.3)                         | 0 (0)                         | 0 (0)                       | 0.0623          | NS                                                                | 4 (15.4)                             | 1 (6.3)                               | 0.6332          | 1 (33.3)                           | 0 (0)                               | 1           |
| Asthma, n (%)                      | 8 (19.5)                       | 2 (5.6)                         | 4 (11.8)                      | 4 (26.7)                    | 0.1310          | NS                                                                | 6 (23.1)                             | 0 (0)                                 | 0.0671          | 1 (33.3)                           | 0 (0)                               | 1           |
| Rheumatologic disease, n (%)       | 0 (0)                          | 2 (5.6)                         | 0 (0)                         | 1 (6.7)                     | 0.1327          | NS                                                                | 0 (0)                                | 1 (6.3)                               | 0.3810          | 0 (0)                              | 0 (0)                               | NA          |
| Immunocompromise, n (%)            | 0 (0)                          | 5 (13.9)                        | 0 (0)                         | 0 (0)                       | <b>0.0069</b>   | NS                                                                | 0 (0)                                | 3 (18.8)                              | 0.0488          | 0 (0)                              | 0 (0)                               | NA          |
| Allergy <sup>+</sup> , n (%)       | 20 (48.8)                      | 6 (16.7)                        | 17 (50)                       | 6 (40)                      | <b>0.0089</b>   | <b>0.023 (a,b)</b><br><b>0.028 (b,c)</b>                          | 12 (46.2)                            | 2 (12.5)                              | <b>0.0420</b>   | 3 (100)                            | 0 (0)                               | 0.1         |
| Neurologic disease, n (%)          | 0 (0)                          | 4 (11.1)                        | 0 (0)                         | 0 (0)                       | <b>0.0217</b>   | NS                                                                | 0 (0)                                | 2 (12.5)                              | 0.1394          | 0 (0)                              | 0 (0)                               | NA          |
| Smoker, n (%)                      | 6 (14.6)                       | 9 (25.0)                        | 5 (14.7)                      | 4 (26.7)                    | 0.4962          | NS                                                                | 4 (15.4)                             | 4 (25)                                | 0.4538          | 1 (33.3)                           | 0 (0)                               | 1           |
| <b>Previous treatment</b>          |                                |                                 |                               |                             |                 |                                                                   |                                      |                                       |                 |                                    |                                     |             |
| Immunosuppressive drugs, n (%)     | 0 (0)                          | 5 (13.9)                        | 0 (0)                         | 0 (0)                       | <b>0.0071</b>   | NS                                                                | 0 (0)                                | 3 (18.8)                              | <b>0.0488</b>   | 0 (0)                              | 0 (0)                               | NA          |
| <b>Symptoms</b>                    |                                |                                 |                               |                             |                 |                                                                   |                                      |                                       |                 |                                    |                                     |             |
| <b>Respiratory</b>                 |                                |                                 |                               |                             |                 |                                                                   |                                      |                                       |                 |                                    |                                     |             |
| Cough, n (%)                       | 28 (68.3)                      | 30 (83.3)                       | NA                            | NA                          | 0.1855          |                                                                   | 19 (73.1)                            | 13 (81.3)                             | 0.7152          | 3 (100)                            | 2 (100)                             | NA          |
| Dyspnea, n (%)                     | 7 (17.1)                       | 19 (52.8)                       | NA                            | NA                          | <b>0.0015</b>   |                                                                   | 6 (23.1)                             | 11 (68.8)                             | <b>0.0084</b>   | 1 (33.3)                           | 2 (100)                             | 0.4         |
| Odynophagia, n (%)                 | 21 (51.2)                      | 6 (16.7)                        | NA                            | NA                          | <b>0.0019</b>   |                                                                   | 15 (57.7)                            | 2 (12.5)                              | <b>0.0045</b>   | 1 (33.3)                           | 0 (0)                               | 1           |
| <b>Constitutional</b>              |                                |                                 |                               |                             |                 |                                                                   |                                      |                                       |                 |                                    |                                     |             |
| Fever, n (%)                       | 22 (53.7)                      | 30 (83.3)                       | NA                            | NA                          | <b>0.0073</b>   |                                                                   | 14 (53.8)                            | 14 (87.5)                             | <b>0.0420</b>   | 1 (33.3)                           | 2 (100)                             | 0.4         |
| Headache, n (%)                    | 34 (82.9)                      | 13 (36.1)                       | NA                            | NA                          | < <b>0.0001</b> |                                                                   | 23 (88.5)                            | 5 (31.3)                              | <b>0.0004</b>   | 2 (66.7)                           | 2 (100)                             | 1           |
| Myalgia, n (%)                     | 26 (63.4)                      | 17 (47.2)                       | NA                            | NA                          | 0.1742          |                                                                   | 16 (61.5)                            | 9 (56.3)                              | 0.7570          | 3 (100)                            | 0 (0)                               | 0.1         |
| Severe fatigue, n (%)              | 0 (0)                          | 21 (58.3)                       | NA                            | NA                          | < <b>0.0001</b> |                                                                   | 0 (0)                                | 11 (68.8)                             | < <b>0.0001</b> | 0 (0)                              | 1 (50)                              | 0.4         |
| Altered mental status, n (%)       | 0 (0)                          | 3 (8.3)                         | NA                            | NA                          | 0.0976          |                                                                   | 0 (0)                                | 1 (6.3)                               | 0.3810          | 0 (0)                              | 0 (0)                               | NA          |

Abbreviations: IQR, interquartile range; NA, not applicable; NS, not statistically significant.

<sup>+</sup> Allergy considered self-reported allergic rhinitis (by seasonal, perennial/year-round, or episodic allergens) and food allergy.

Categorical variables compared using Fisher-Freeman-Halton's exact test<sup>\*</sup>; Pairwise Fisher's exact test<sup>#</sup>; Fisher's exact test<sup>^</sup>.

Continuous variables compared using Kruskal-Wallis test<sup>\*</sup>; Wilcoxon Rank Sum<sup>#</sup>.

**Supplementary Table 2. List of reagents and resources used in this study.**

| <b>REAGENT or RESOURCE</b>                             | <b>SOURCE</b>                | <b>IDENTIFIER</b> |
|--------------------------------------------------------|------------------------------|-------------------|
| <b>Anti-Human IgG1-PE</b>                              | Southern Biotech             | HP6001            |
| <b>Anti-human IgG2-PE</b>                              | Southern Biotech             | 31-7-4            |
| <b>Anti-human IgG3-PE</b>                              | Southern Biotech             | HP6050            |
| <b>Anti-human IgG4-PE</b>                              | Southern Biotech             | HP6025            |
| <b>Anti-human IgM-PE</b>                               | Southern Biotech             | SA-DA4            |
| <b>Anti-human IgA1-PE</b>                              | Southern Biotech             | HP6025            |
| <b>Human FcγRIIA</b>                                   | Duke Human Vaccine Institute | Custom Order      |
| <b>Human FcγRIIB</b>                                   | Duke Human Vaccine Institute | Custom Order      |
| <b>Human FcγRIIAV</b>                                  | Duke Human Vaccine Institute | Custom Order      |
| <b>Human FcγRIIB</b>                                   | Duke Human Vaccine Institute | Custom Order      |
| <b>Anti-CD66b Pac Blue</b>                             | BioLegend                    | 305112            |
| <b>SARS-CoV-2 WT S1</b>                                | Sino Biological              | 40591-V08H        |
| <b>SARS-CoV-2 WT S2</b>                                | Sino Biological              | 40590-V08B        |
| <b>SARS-CoV-2 WT Spike</b>                             | Sino Biological              | 40589-V08H4       |
| <b>SARS-CoV-2 WT NTD</b>                               | Sino Biological              | 40591-V49H        |
| <b>SARS-CoV-2 WT Receptor Binding Domain (RBD)</b>     | Sino Biological              | 40592-V08H        |
| <b>SARS-CoV-2 Alpha Variant S</b>                      | Sino Biological              | 40589-V08B6       |
| <b>SARS-CoV-2 Alpha Variant RBD</b>                    | Sino Biological              | 40592-V08H82      |
| <b>SARS-CoV-2 Beta Variant S</b>                       | Sino Biological              | 40589-V08B7       |
| <b>SARS-CoV-2 Beta Variant RBD</b>                     | Sino Biological              | 40592-V08H59      |
| <b>SARS-CoV-2 Gamma Variant S</b>                      | Sino Biological              | 40589-V08B10      |
| <b>SARS-CoV-2 Gamma Variant RBD</b>                    | Sino Biological              | 40592-V08H86      |
| <b>SARS-CoV-2 Delta Variant S</b>                      | Sino Biological              | 40589-V08B16      |
| <b>SARS-CoV-2 Delta Variant RBD</b>                    | Sino Biological              | 40592-V08H115     |
| <b>SARS-CoV-2 Omicron Variant S</b>                    | Sino Biological              | 40589-V08H26      |
| <b>SARS-CoV-2 Nucleocapsid</b>                         | Sino Biological              | 40588-V08B        |
| <b>SARS-CoV-2 Omicron Variant RBD</b>                  | Sino Biological              | 40592-V08H121     |
| <b>Human Coronavirus OC43 S</b>                        | Sino Biological              | 40607-V08B        |
| <b>Human CoV HKU1 S (isolate N5)</b>                   | Sino Biological              | 40606-V08B        |
| <b>PE-Streptavidin</b>                                 | Agilent Technologies         | PB32-10           |
| <b>NHS-Sulfo-LC-LC Kit</b>                             | ThermoFisher                 | 21435             |
| <b>Zebra-Spin Desalting and Chromatography Columns</b> | ThermoFisher                 | 89882             |
| <b>Green Fluorescent Neutravidin Microspheres</b>      | ThermoFisher                 | F8776             |
| <b>Red Fluorescent Neutravidin Microspheres</b>        | ThermoFisher                 | F8775             |

|                                             |                        |                                                                                                          |
|---------------------------------------------|------------------------|----------------------------------------------------------------------------------------------------------|
| <b>MagPlex Microspheres</b>                 | Luminex MFG            | MC12001-01<br>(Cataloged by region)                                                                      |
| <b>THP-1 Monocytes</b>                      | ATCC                   | CVCL_0006                                                                                                |
| <b>384-well HydroSpeed Plate Washer</b>     | Tecan                  | 30190112                                                                                                 |
| <b>iQue Screener Plus</b>                   | Intellicyt/Sartorius   | 11811                                                                                                    |
| <b>iQue Forecyt</b>                         | Sartorius              | 60028                                                                                                    |
| <b>Vero E6 cells</b>                        | ATCC                   | CRL-1586, RRID:<br>CVCL_0574                                                                             |
| <b>MEM</b>                                  | Gibco                  | 11095-080                                                                                                |
| <b>FBS</b>                                  | Gibco                  | 16000-044                                                                                                |
| <b>pCEP4-myc-ACE2</b>                       | Addgene                | 141185                                                                                                   |
| <b>Hygromycin</b>                           | Invitrogen             | 10687010                                                                                                 |
| <b>Optical bottom 96-well plates</b>        | Thermo Scientific      | 165305                                                                                                   |
| <b>Formaldehyde</b>                         | Pierce                 | 28906                                                                                                    |
| <b>4',6-diamidino-2-phenylindole (DAPI)</b> | Invitrogen             | D1306                                                                                                    |
| <b>R Studio V 1.4.1103</b>                  | RStudio, PBC           | Open Source                                                                                              |
| <b>GraphPad Prism</b>                       | GraphPad Software, LLC | Ragon Site License                                                                                       |
| <b>FlowJo V. 10.8</b>                       | FlowJo, LLC            | <a href="http://www.flowjo.com/solutions/flowjo/downloads">www.flowjo.com/solutions/flowjo/downloads</a> |

**A**

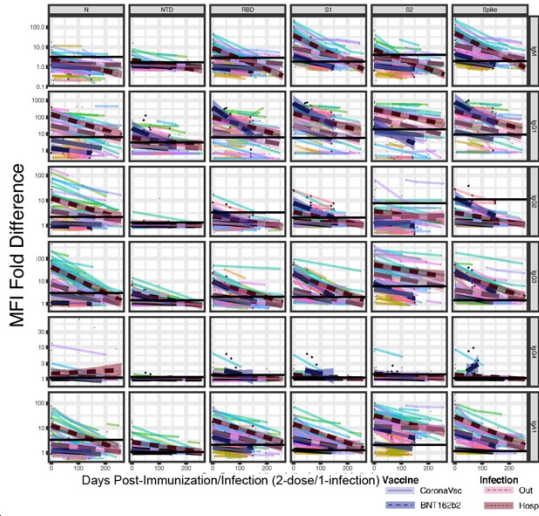

**B**

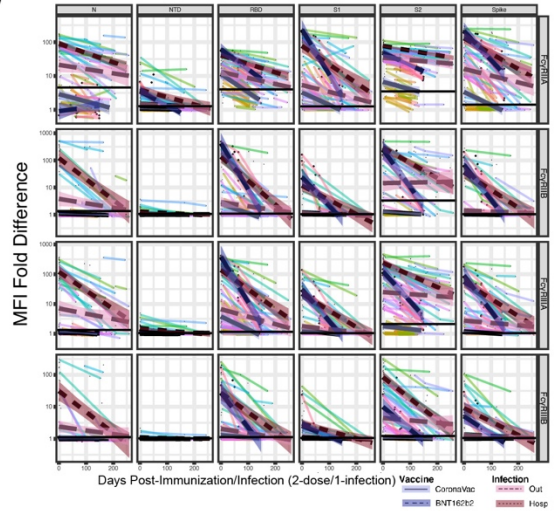

**C**

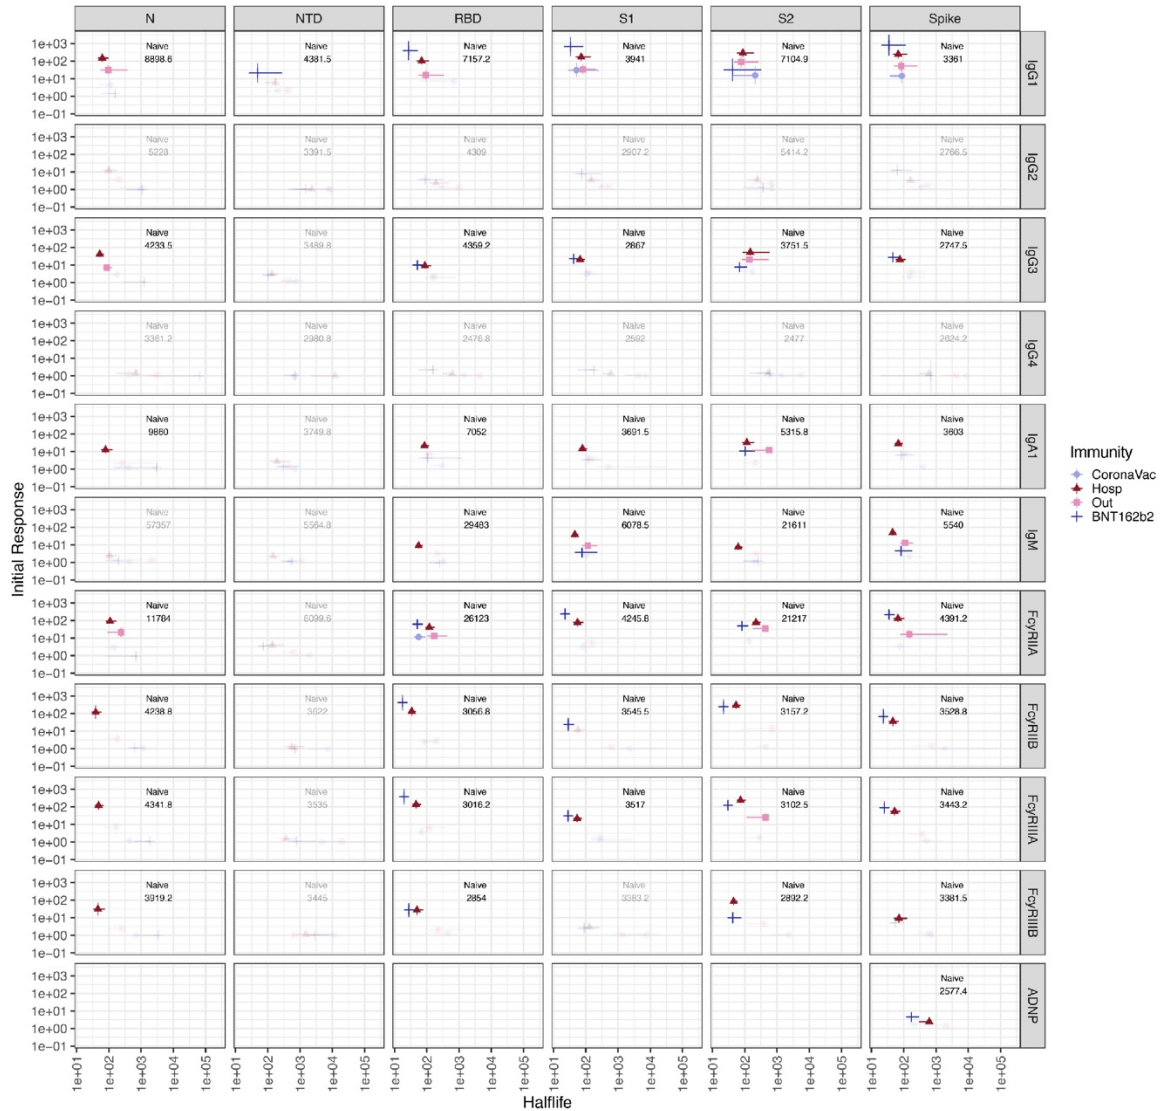

**Supplemental FigS1. WT Spike subdomain-specific MFI decay over time post-infection or vaccination for Immunoglobulin and FcγR.** (A, B) Scatter plots show subject-specific (line color) decline in immunoglobulin response and FcγR binding specific to WT Spike subdomains. Log-linear mixed-effect models with subject-specific random intercepts and slopes estimated trend-lines and 95% confidence intervals using data from subjects following the second BNT162b2 dose (dark-violet), second CoronaVac dose (light-blue), Hospitalized individuals (dark-purple), or Outpatient (light-pink). Horizontal grey lines indicate the innate Spike reactivity in Naïve (no-exposure) samples. Color legend shown at bottom for each panel. (C) Regression intercepts and slopes, indicating initial response and decay rate, are plotted with 95% confidence intervals for by each Spike subdomain. Decay and response parameters across variants (shapes) are stratified by infection/vaccination type (color and shape). Shaded out regions indicate a response < the 97.5<sup>th</sup> percentile of the naïve response. Y-axis units are MFI fold difference respect to the Naïve group.

**A**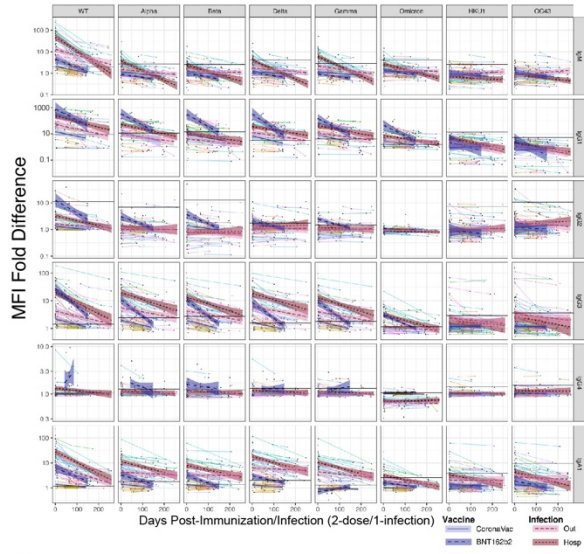**B**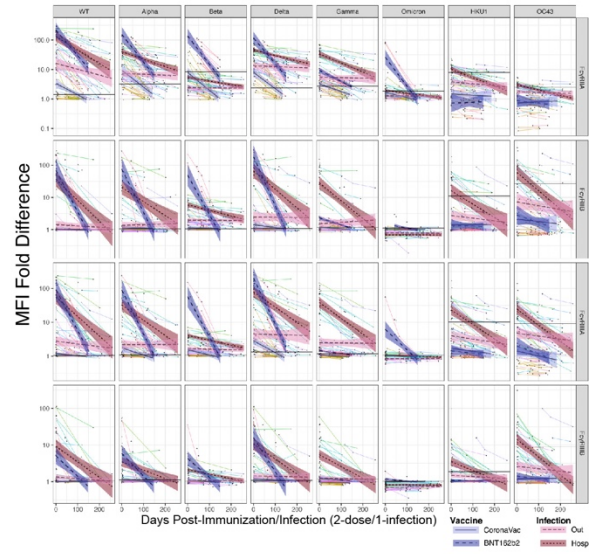**C**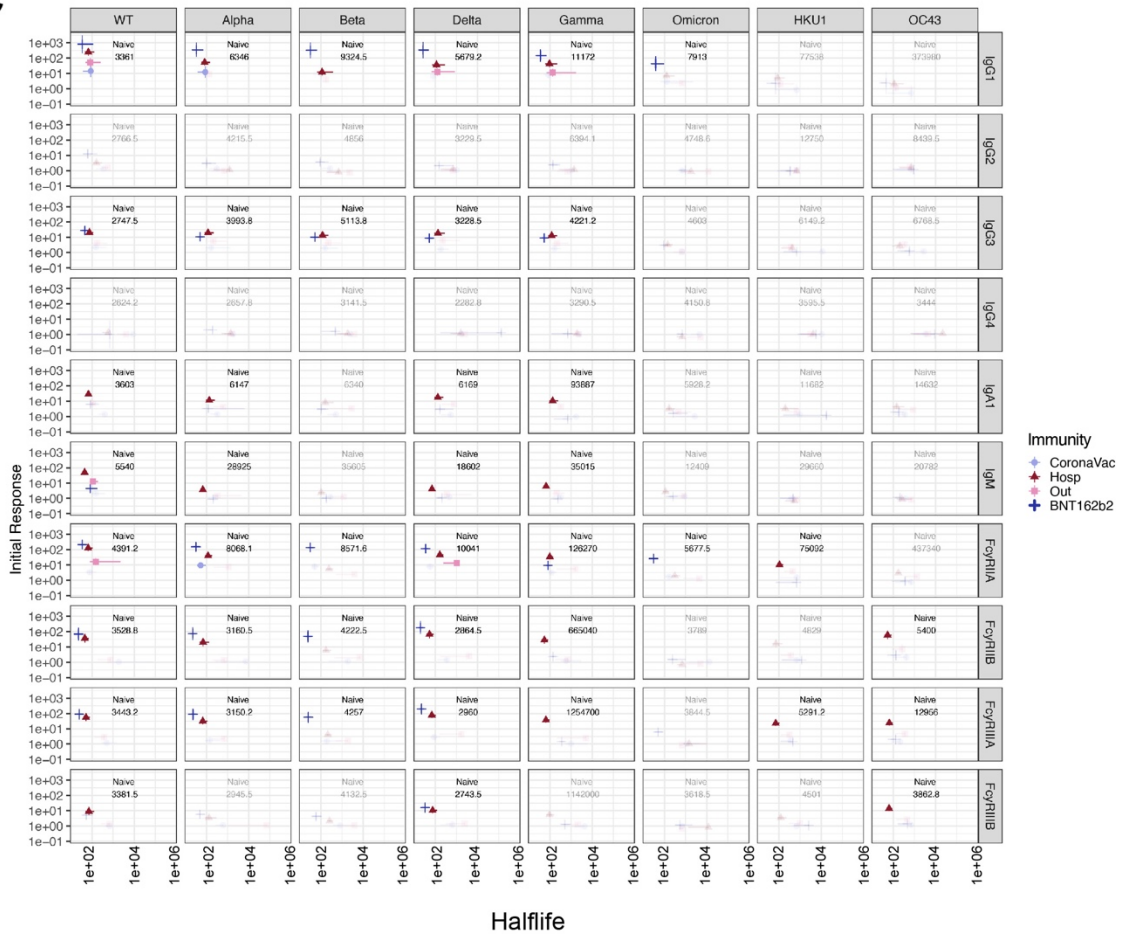



**Supplemental FigS2. Spike-specific MFI decay across VOC over time post-infection or vaccination for Immunoglobulin and FcR.** (A, B) Scatter plots show subject-specific (line color) decline in immunoglobulin response and FcR binding specific to various VOC Spikes. Log-linear mixed-effect models with subject-specific random intercepts and slopes estimated trend-lines and 95% confidence intervals using data from subjects following the second BNT162b2 (dark-violet), dose, second CoronaVac dose (light-blue), Hospitalized individuals (dark-purple), or Outpatient (light-pink). Horizontal grey lines indicate the innate Spike reactivity in Naïve (no-exposure) samples. Color legend shown at bottom for each panel. (C) Regression intercepts and slopes, indicating initial response and decay rate, are plotted with 95% confidence intervals for by each Spike subdomain. Decay and response parameters across variants (shapes) are stratified by infection/vaccination type (color and shape). Shaded out regions indicate a response < the 97.5<sup>th</sup> percentile of the naïve response. Y-axis units are MFI fold difference respect to the Naïve group.

**A**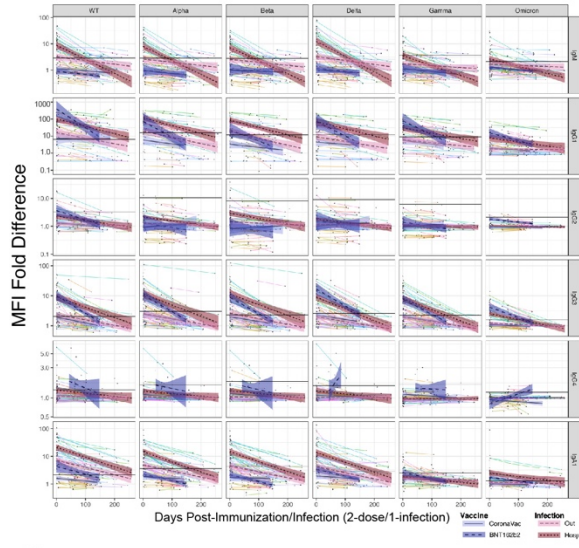**B**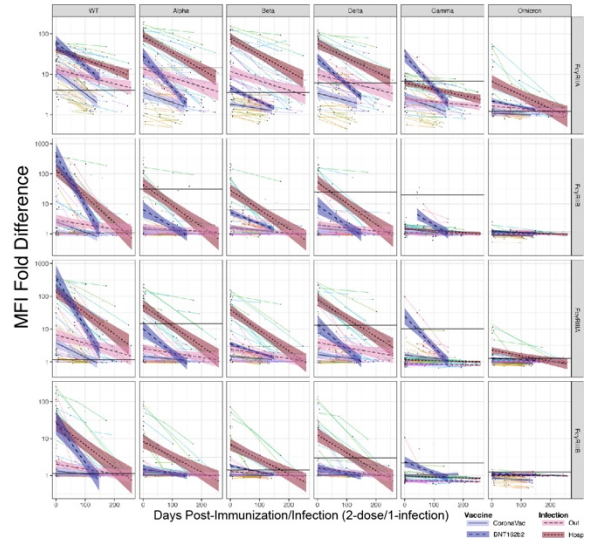**C**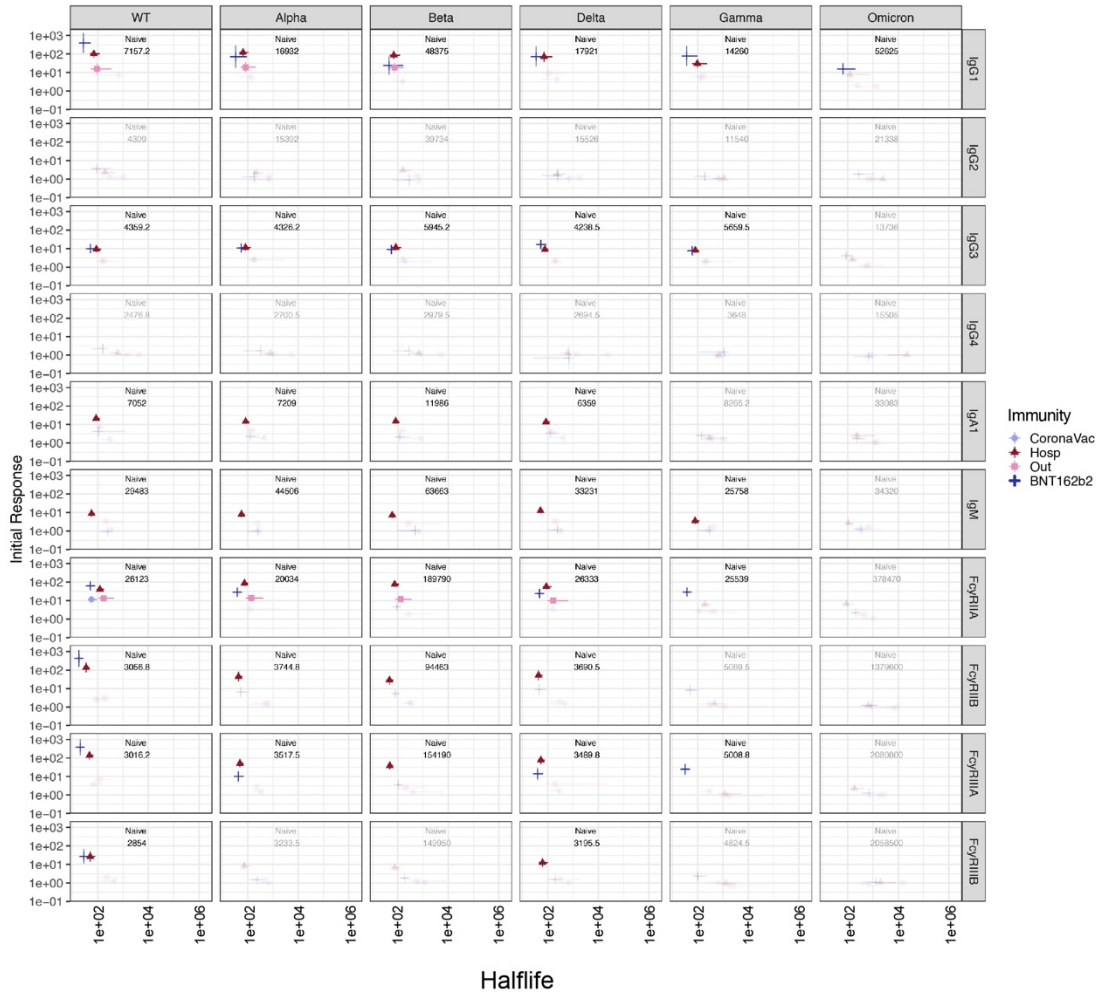

**Supplemental FigS3. RBD-specific MFI decay across VOC over time post-infection or vaccination for Immunoglobulin and FcR.** (A,B) Scatter plots show subject-specific (line color) decline in immunoglobulin response and FcR binding specific to various VOC RBDs. Log-linear mixed-effect models with subject-specific random intercepts and slopes estimated trend-lines and 95% confidence intervals using data from subjects following the second BNT162b2 (dark-violet), dose, second CoronaVac dose (light-blue), Hospitalized individuals (dark-purple), or Outpatient (light-pink). Horizontal grey lines indicate the innate spike reactivity in Naïve (no-exposure) samples. Color legend shown at bottom for each panel. (C) Regression intercepts and slopes, indicating initial response and decay rate, are plotted with 95% confidence intervals for by each Spike subdomain. Decay and response parameters across variants (shapes) are stratified by infection/vaccination type (color and shape). Shaded out regions indicate a response < the 97.5<sup>th</sup> percentile of the naïve response. Y-axis units are MFI fold difference respect to the Naïve group.

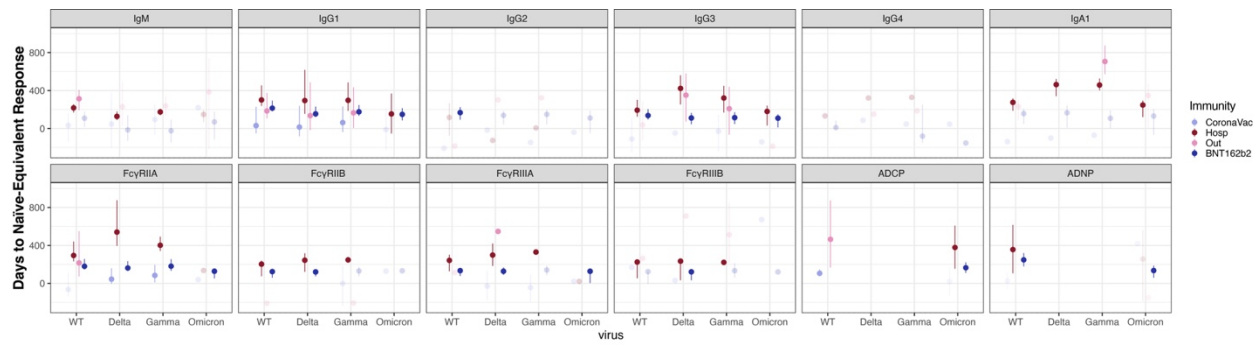

**Supplemental FigS4. Time to decay calculated from the log-linear regression models.** Point-ranges display the predicted decay periods over which each inoculation- or infection-induced initial response to corresponding naïve (no-exposure) response; the range corresponds to the time predicted for each model to reach the 97.5<sup>th</sup>, 50<sup>th</sup>, and 2.5<sup>th</sup> percentile of the naïve response distribution s.t.  $\text{Time} = (\text{Naïve}_{97.5^{\text{th}}, 50^{\text{th}}, 2.5^{\text{th}}} - \text{Decay}) / \text{Initial}$ . Color legend for group is shown on the right.



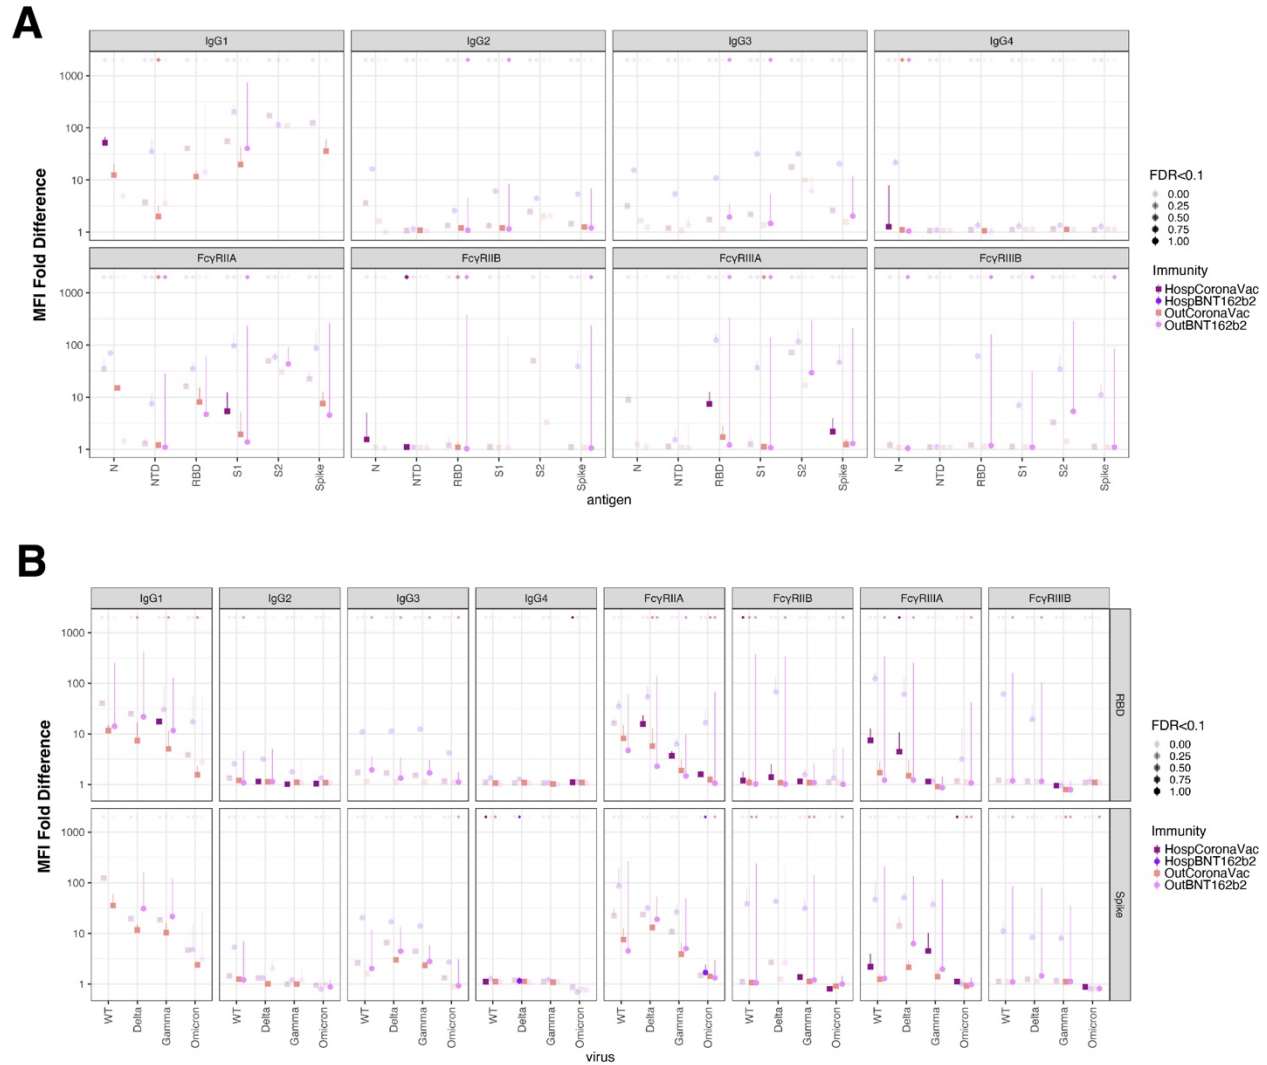

**Supplemental FigS6. Hybrid boosting expands binding breadth for both outpatient and hospitalized recoverees.** Point-ranges indicating the lowest response observed post-infection (circle/square) and the increase in response observed post-vaccination (line height) where response is  $\log_{10}(\text{MFI}/\text{MFI}_{\text{naive}})$ . Plots are stratified by assay, antigen, and VOC and colored by infection and vaccination type. Point-ranges are transparent if a multiple test corrected paired t-test on response is not significant ( $\text{FDR} > 0.1$ ). An opaque diamond is added above each point-range if the waned response is less than naïve, the boosted response is greater than naïve, and the multiple test corrected paired t-test is significant. Color legend for group is shown on the right. Y-axis units are MFI fold difference.

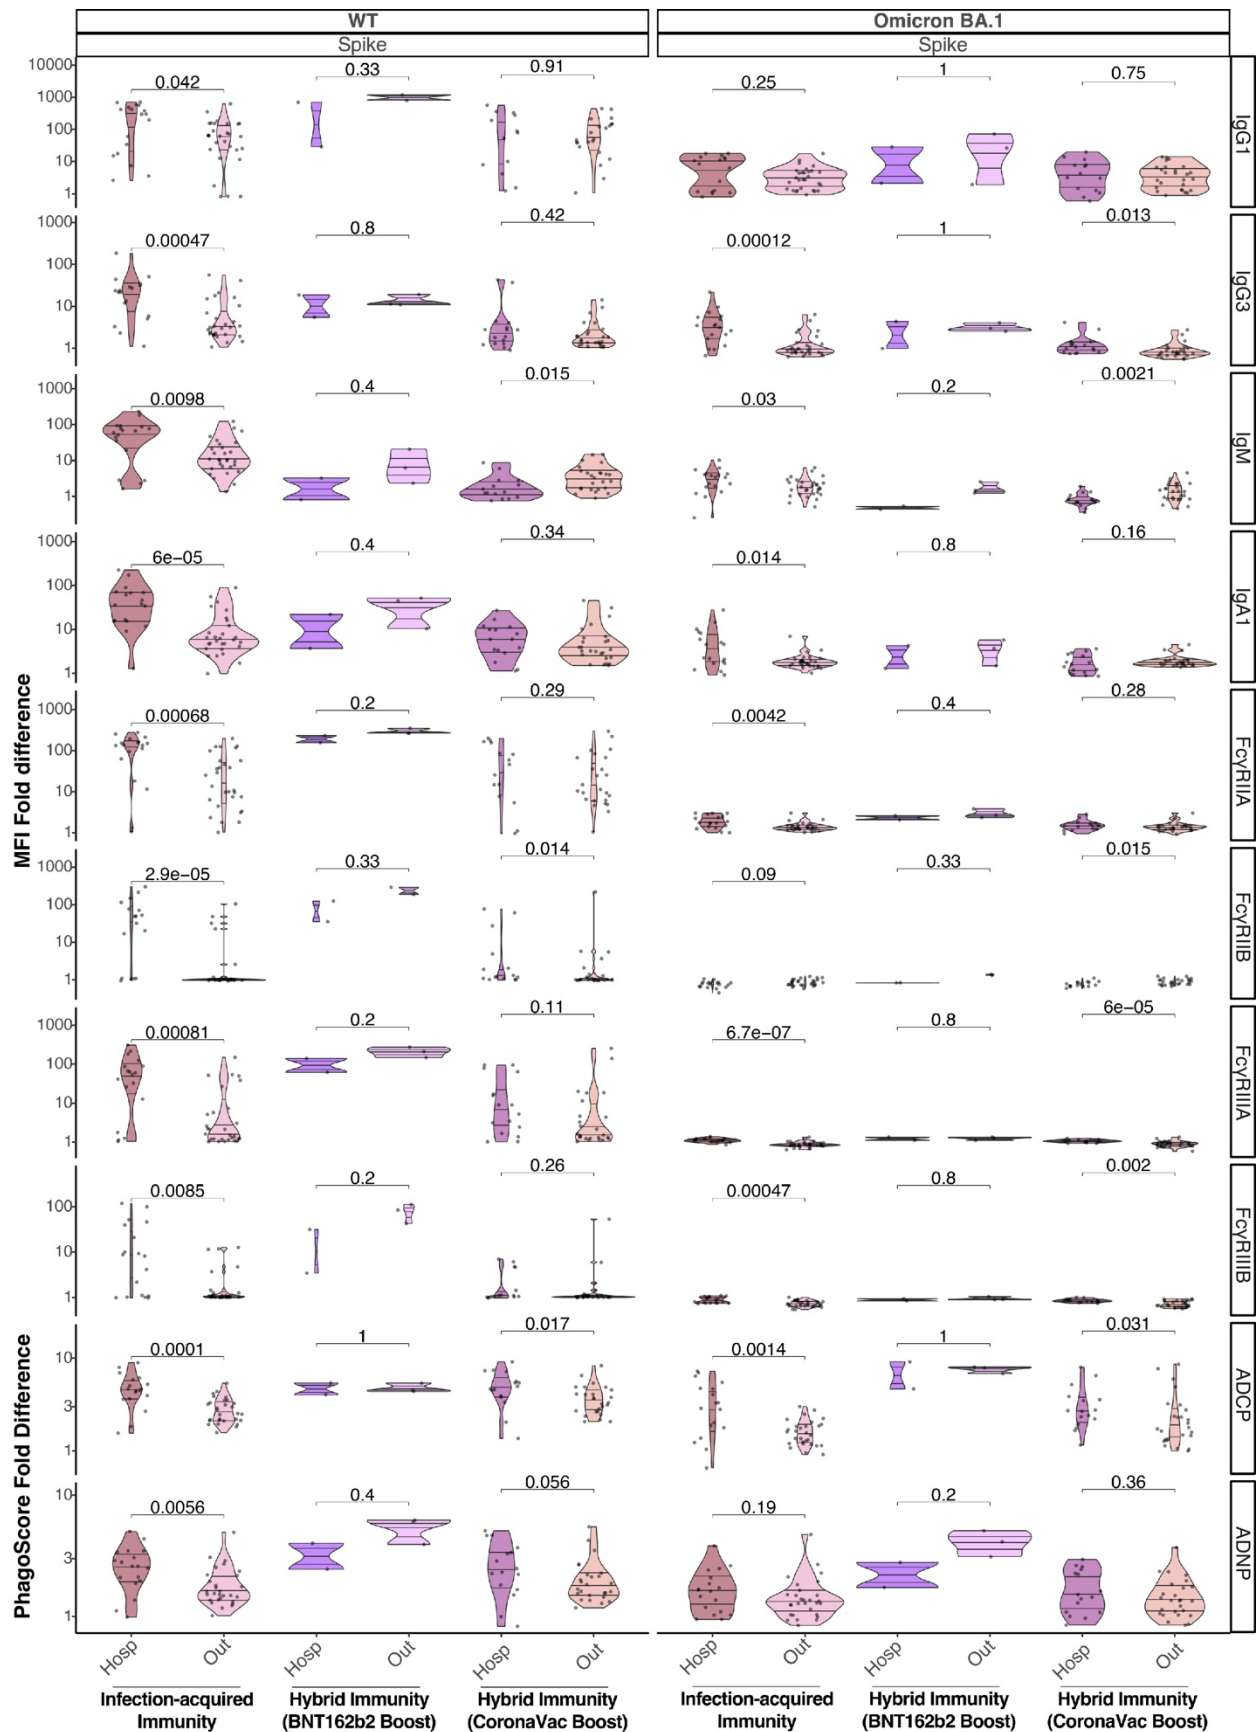

**Supplemental FigS7. Comparison of the peak response post-infection to the peak response following post-infection.** Violin plots comparing the immune response (MFI/MFI\_naive) to Omicron and WT Spike binding and function given either CoronaVac or Pfizer vaccination post-infection. (a) Violin plots compare the peak response post-infection to the peak response following post-infection vaccination. Q-values indicate the FDR corrected significance for each corresponding t-test.



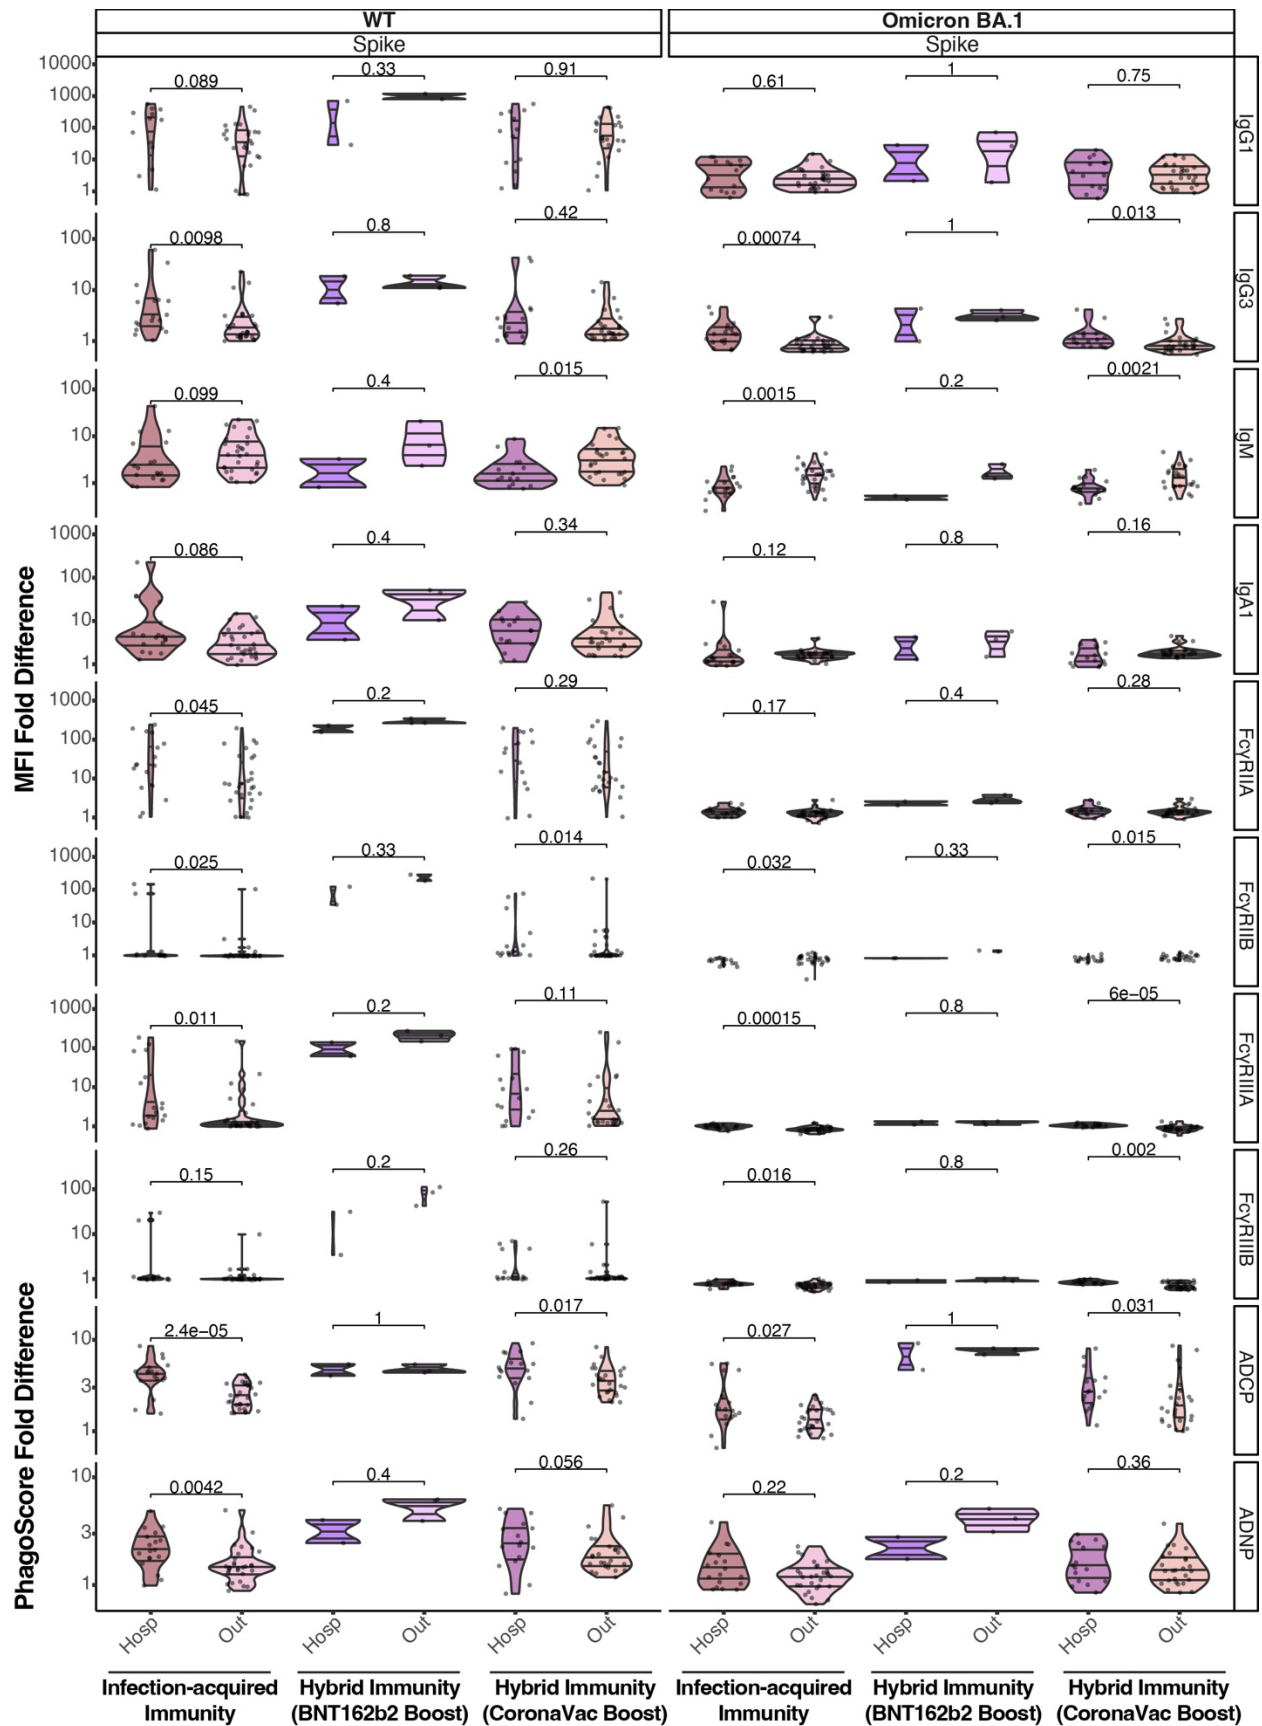

**Supplemental FigS8. Comparison of waning with peak response following post-infection boosting.** Violin plots comparing the immune response (MFI/MFI\_naive) to Omicron and WT Spike binding and function given either CoronaVac or Pfizer vaccination post-infection. Violin plots compare waning with peak response following post-infection boosting. The infection-only boxplots (Out or Hosp) represent the fully waned response (response at the farthest timepoint following infection) while the paired post-infection vaccination boxplots represent peak immunity following vaccination. Q-values indicate the FDR corrected significance for each corresponding t-test.
